# Supplementary material
Source: PubMed Central journal article supplement (PMC3286953)
Supplement: 1116107109_pnas.201116107SI.pdf [file 1116107109_pnas.201116107SI.pdf]

# Supporting Information

Kincaid et al. 10.1073/pnas.1116107109

## SI Materials and Methods

**Cell Lines.** HEK293 and 293T cells were obtained from American Type Culture Collection (ATCC) and maintained in DMEM supplemented with 10% (vol/vol) FBS (Cellgro). BL3.1 cells were obtained from ATCC and maintained in RPMI 1640 supplemented with 10% (vol/vol) FBS. Fetal lamb kidney-bovine leukemia virus (FLK-BLV) cells (Gift from L. Mansky, University of Minnesota, Minneapolis) were maintained in DMEM supplemented with 10% (vol/vol) FBS.

**Plasmids.** Cassettes encompassing the predicted miRNA genes were synthesized by Integrated DNA Technologies (IDT) in the context of the pIDT-SMART-KAN vector (sequences are listed in Table S4). The Box B mutant, pIDT-SMART-KAN-NC\_001414\_RNA\_MUTB, was generated by PCR using phosphorylated primers (BLV\_RTH\_F and BLV\_RTH\_R) followed by DpnI digestion and self-ligation to mutate the sequence “GGG” to “AAA” at positions 6559–6561 (positions relative to refseq NC\_001414). The murine herpesvirus 68 (MHV68) mir-M1-7 miRNA expression vector was made by PCR using as template a BAC containing the wild-type genome as a template (1) (kindly provided by Scott Tibbetts, University of Florida, Gainesville). The primers used for the MHV68 miRNA amplification are listed in the primer section Mir-M7-7 sense XhoI and Mir-M1-7 antisense XbaI and cloned into pIDT-SMART-KAN XhoI/XbaI. The BLV miRNA region was amplified via PCR using genomic DNA from BL3.1 cells and the BLV miRNA primers. Because of a SNP (6665 deletion) that generated an internal XhoI site, pcDNA3.1dsRluc BLV miRNAs was made by first cloning in nucleotides 6133–6620 into XhoI/XbaI site in pcDNA3.1dsRluc (2). Nucleotides 6621–6739 were then cloned into the XbaI/ApaI site. The pIDT-SMART-KAN-BLV expression vector was made by cloning nucleotides 6133–6669 into the XhoI site, which encompasses only the first four miRNA hairpins. pcDNA3.1dsRluc-776 was made by PCR amplification from SV40 776 genomic DNA using the 776 miR-Xho-F and 776 miR-Xba1-R primers and cloned into the XhoI/XbaI site. The KapB miRNA expression vector was made by subcloning the KapB 3' UTR from pcDNA3.1dsLuc2CP-KapB expression vector (3) into the XhoI/XbaI site of pcDNA3.1dsRluc. The pcDNA3.1dsRluc-MHV68 miR-M1-7 construct was made by subcloning the insert from pIDT-SMART-KAN-MHV68 miR-M1-7. The bovine mir-29a insert was amplified from BL3.1 genomic DNA with the primers BTA\_mir29a\_F and BTA\_mir29a\_R and cloned into the XhoI, XbaI sites of pcDNA3.1+Puro to generate pcDNA3.1-bta-mir-29a. The bovine HMG-box transcription factor 1 (HBP1) 3'UTR was amplified from BL3.1 genomic DNA using primers BTA\_HPBI\_3UTR\_F and BTA\_HPBI\_3UTR\_R and ligated into the XhoI, XbaI sites of pcDNA3.1dsRluc. The bovine HBP1 3'UTR seed mutant was generated by subcloning a fragment synthesized by IDT with the sequence “TG” replaced with “CC” at positions 252–253 into the EcoRV, BbvCI sites of the HBP1 3'UTR in the context of pcDNA3.1dsRluc- HBP1 3'UTR. The bovine peroxidase homolog (PXDN) 3'UTR (ENSBTAT00000043174) was synthesized by IDT in the context of the pIDT-SMART-KAN vector and subcloned into the XhoI, XbaI sites of pcDNA3.1dsRluc. The bovine PXDN 3'UTR seed mutant was synthesized in a similar fashion with the sequence “TG” replaced with “CC” at position 193–194 by IDT in the context of the pIDT-SMART-KAN vector and subcloned into the XhoI, XbaI sites of pcDNA3.1dsRluc. The GAPDH 3'UTR was amplified from DLD1 cell genomic DNA with primers GAPDH\_F and GAPDH\_R and cloned into the XhoI,

XbaI sites of pcDNA3.1dsRluc to generate pcDNA3.1dsRluc-GAPDH. RNA-induced silencing complex (RISC) Assay Luciferase reporters were generated with two long oligonucleotides of opposing orientations, which encoded for two complementary binding sites for the various miRNAs separated by eight nucleotides. Each oligonucleotide possesses an overlap of 20 complementary base pairs and were annealed and elongated using Taq polymerase (New England Biolabs) (98 °C 30 s, 98 °C 10 s, 55 °C 20 s, 72 °C 10 s, 72 °C 5 min). Extended target sites were then cloned into the XhoI/XbaI site pcDNA3.1dsRluc.

**Pol III miRNA Prediction.** The Pol III miRNA prediction algorithm was implemented as a Python script. The first step of the algorithm is to perform a search of an individual viral genome for a B Box-like promoter sequence. Next, a window of  $W_{AB}$  nucleotides (70 nt) upstream of the B Box-like sequence is searched for an A Box-like sequence. If an A Box-like sequence is found, then a window of  $W_{BT}$  nucleotides (250 nt) downstream of the B Box-like sequence is searched for a short Terminator sequence. RNA secondary-structure prediction is conducted on the sequence of the predicted gene using RNAfold (4). Predicted genes that overlap extensively with annotated viral protein coding sequences (50 or more nucleotides) are discarded and a search for secondary structural elements associated with miRNA stem-loops is performed. Each individual stem-loop is subject to a second round of secondary-structural prediction and an energy cutoff ( $\Delta G \leq -22$ ) is applied. B Box sequences used included GTTCNANNC, GGTTSGNG, and GKWCAAGTC. A Box sequences used included TRGNNNNNNGR, TRGNNNNNNGR, and TRGCTC. Terminator sequences used included TTTT and a string of four or more Ts with one substitution. The algorithm was tested on the MHV68 genomic sequence (NC\_001826) and correctly identifies MHV68 encoded tRNA-like miRNAs.

**Small RNA Northern Blots.** Small RNA Northern blot analysis was performed as previously described (5). Specific probes are listed in Table S4.

**Synthetic Gene Small RNA Sequencing.** T75 flasks of subconfluent HEK293T cells were transfected with 15  $\mu$ g of pIDT-SMART-KAN-NC\_001414\_RNA or pIDT-SMART-KAN-NC\_010819\_RNA using the Turbofect reagent (Fermentas). Transfections were repeated the following day. Total RNA was harvested at ~48 h. Sixty micrograms of total RNA from each sample was pooled with additional samples for a total of 300  $\mu$ g total RNA and size fractionated on a 15% (vol/vol) Urea-PAGE gel. Small RNA libraries for SOLiD sequencing were then prepared as described previously (6). Sequencing adapter sequences were trimmed from the color space reads using custom Python scripts, and any sequences with ambiguous calls or less than 18 nt in length after trimming were removed from further analysis. The preprocessed reads were then mapped to viral genomic reference sequences (NC\_001414 and NC\_010819). The 5' start site counts and coverage were calculated using custom Python scripts and visualized using the gnuplot software package.

**Small RNA Sequencing BL3.1 Cells.** Total RNA was harvested from BL3.1 cells in log-phase growth. Then, 200  $\mu$ g of total RNA was size-fractionated on a 15% (vol/vol) PAGE and used to prepare small RNA libraries for SOLiD sequencing, as previously described (6). Sequencing adapter sequences were trimmed from the color space reads using custom Python scripts, and any sequences with ambiguous calls or less than 18 nt in length after trimming were removed from further analysis. The preprocessed reads were then

mapped to the BLV reference genome (National Center for Biotechnology Information accession number NC\_001414) using the SHRIMP2 software package (7). The 5' start site counts and coverage were calculated using custom Python scripts and visualized using the gnuplot software package. Genome CDS maps were generated from the NC\_001414 reference sequence and the Geneious software package (Biomatters).

**Precursor miRNA Structure Prediction.** Predicted secondary structures of miRNA hairpins were generated using Mfold RNA folding prediction Web server (8, 9) or the RNAfold prediction Web server (4), as indicated.

**Host Target Analysis.** Conservation of HBP1 and PXDN mir-29 target sites was assessed using the Targetscan Web site (10). Alignment regions flanking the predicted target sites were manually extracted from the Targetscan alignment.

**Host Target Luciferase Assays.** Twelve-well plates of HEK293T cells were transfected in triplicate with 5 ng *Renilla* (pcDNA3.1dsRluc) 3' UTR reporter, 5 ng firefly reporter (pcDNA3.1dsLuc2CP), and 1 µg of miRNA expression vector (or empty expression vector) using the Turbofect reagent (Fermentas). Twenty-four hours after transfection, the cells were harvested and processed with the Dual-Glo Luciferase Assay System (Promega) according to the manufacturer's instructions. The luciferase activity was measured on a Luminoskan Ascent luminometer (Thermo Electronic). Results for the host 3'UTR reporters are presented with the relative *Renilla* to firefly luciferase levels normalized to identical reactions transfected with empty expression vectors. Student *t* test was performed to assess statistical significance of observed differences.

**RNA Polymerase III Dependence.** HEK293T cells were transfected with 1 µg of expression vector and, where indicated, were then treated 2 h later with a final concentration of 50 µg/mL of  $\alpha$ -amanitin (11). Total RNA was extracted 24 h posttransfection and Northern blot analysis performed.

**Box B Mutant Analysis.** HEK293T cells were transfected with 1 µg of pIDT empty vector, BLV mir-B4 miRNA expression vector, or the BLV mir-B4 Box B mutant using Turbofect reagent (Fermentas) in 12-well plates. Total RNA was extracted 30 h posttransfection and Northern blot analysis was performed.

**RISC Activity Assay.** Five nanograms *Renilla* (pcDNA3.1dsRluc) 3'UTR reporter, 5 ng firefly reporter (pcDNA3.1dsLuc2CP), and 1

µg of BLV miRNA expression vector were cotransfected into HEK293 cells in 12-well plates using Turbofect reagent (Fermentas). Twenty-four hours after transfection, the cells were harvested and processed with the Dual-Glo Luciferase Assay System (Promega) according to the manufacturer's instructions. The luciferase activity was measured on a Luminoskan Ascent luminometer (Thermo Electronic). All reporter expression is normalized to the empty *Renilla* luciferase vector.

**Drosha Knockdown.** HEK293T cells in 12-well plates were treated with 20 nM of Drosha siRNA (3, 12) using Lipofectamine RNAi-MAX following manufacturer's recommendations (Invitrogen). Twenty-four hours later, a second knockdown was performed followed by transfection of miRNA expression vectors using the Turbofect reagent according to the manufacturer's recommendations (Fermentas). Thirty hours later, RNA was extracted using PIG-B (13) and Northern blot analysis was performed.

**Dicer Dependence.** Dicer wild-type cells (DLD1) and cells hypomorphic for Dicer activity [DLD1 Dicer<sup>Ex5-/-</sup> cell lines (14)] were transfected with 2 µg of the BLV B4 or the positive control MHV68 M1-7 miRNA expression vectors using the Turbofect reagent according to the manufacturer's recommendations (Fermentas). Thirty-six hours posttransfection, total RNA was extracted using PIG-B (13) and Northern blot analysis was performed.

**Drosha Activity Assay.** HEK293 cells in 12-well plates were transfected with 5 ng *Renilla* (pcDNA3.1dsRluc) 3'UTR reporter, 5 ng firefly reporter (pcDNA3.1dsLuc2CP), and either 1 µg of pcDNA 3.1+ or 0.5 µg of Drosha and 0.5 µg of DGCR8 expression vector (12) using the Turbofect reagent. Twenty-four hours after transfection the cells were harvested and processed with the Dual-Glo Luciferase Assay System (Promega) according to the manufacturer's instructions. The luciferase activity was measured on a Luminoskan Ascent luminometer (Thermo Electronic).

**Microprocessor Overexpression.** HEK293 cells in 12-well plates were transfected with 0.6 µg of the pcDNA3.1dsRluc-BLV miRNA, the pcDNA3.1dsRluc-MHV68 miR-M1-7, or pcDNA3.1dsRluc-SV40 miRNA and either 0.6 µg of pcDNA 3.1+ or 0.3 µg of Drosha and 0.3 µg of DGCR8 expression vectors were cotransfected into 293T cells. RNA was extracted 30 h posttransfection and Northern blot analysis was performed.

- Adler H, Messerle M, Wagner M, Koszinowski UH (2000) Cloning and mutagenesis of the murine gammaherpesvirus 68 genome as an infectious bacterial artificial chromosome. *J Virol* 74:6964–6974.
- Seo GJ, Fink LH, O'Hara B, Atwood WJ, Sullivan CS (2008) Evolutionarily conserved function of a viral microRNA. *J Virol* 82:9823–9828.
- Lin YT, Sullivan CS (2011) Expanding the role of Drosha to the regulation of viral gene expression. *Proc Natl Acad Sci USA* 108:11229–11234.
- Hofacker IL, Fontana W, Stadler PF, Bonhoeffer M, Schuster P (1994) Fast folding and comparison of RNA secondary structures. *Monatsh Chem* 125:167–188.
- McClure LV, Lin YT, Sullivan CS (2011) Detection of viral microRNAs by Northern blot analysis. *Methods Mol Biol* 721:153–171.
- Chen CJ, Kincaid RP, Seo GJ, Bennett MD, Sullivan CS (2011) Insights into Polyomaviridae microRNA function derived from study of the bandicoot papillomatosis carcinomatous viruses. *J Virol* 85:4487–4500.
- Rumble SM, et al. (2009) SHRIMP: Accurate mapping of short color-space reads. *PLoS Comput Biol* 5:e1000386.
- Mathews DH, Sabina J, Zuker M, Turner DH (1999) Expanded sequence dependence of thermodynamic parameters improves prediction of RNA secondary structure. *J Mol Biol* 288:911–940.
- Zuker M (2003) Mfold web server for nucleic acid folding and hybridization prediction. *Nucleic Acids Res* 31:3406–3415.
- Lewis BP, Burge CB, Bartel DP (2005) Conserved seed pairing, often flanked by adenosines, indicates that thousands of human genes are microRNA targets. *Cell* 120: 15–20.
- Bogerd HP, et al. (2010) A mammalian herpesvirus uses noncanonical expression and processing mechanisms to generate viral MicroRNAs. *Mol Cell* 37:135–142.
- Han J, et al. (2004) The Drosha-DGCR8 complex in primary microRNA processing. *Genes Dev* 18:3016–3027.
- Weber K, Bolander ME, Sarkar G (1998) PIG-B: A homemade monophasic cocktail for the extraction of RNA. *Mol Biotechnol* 9:73–77.
- Cummins JM, et al. (2006) The colorectal microRNAome. *Proc Natl Acad Sci USA* 103: 3687–3692.

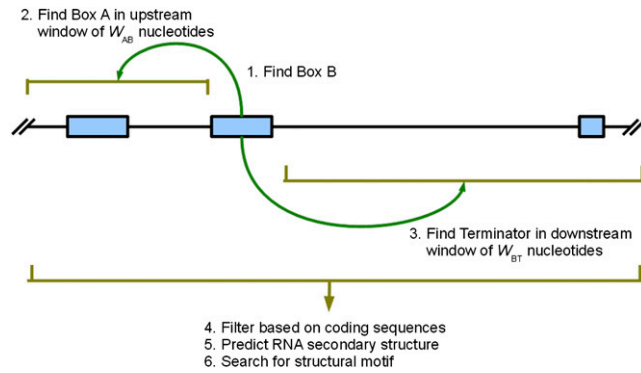

**Fig. S1.** Visual representation of pol III miRNA prediction algorithm. First, a search for a B Box-like sequence is performed. Once a B Box-like sequence is found, a window upstream of this position is searched for an A Box-like sequence. If an A Box-like sequence is found, then a window downstream of the B Box-like sequence is searched for a terminator like sequence. The predicted pol III gene is checked for overlap with annotated coding sequences and the secondary structural prediction is performed. Finally, the predicted secondary structure is searched for pre-miRNA like stem-loop structures.

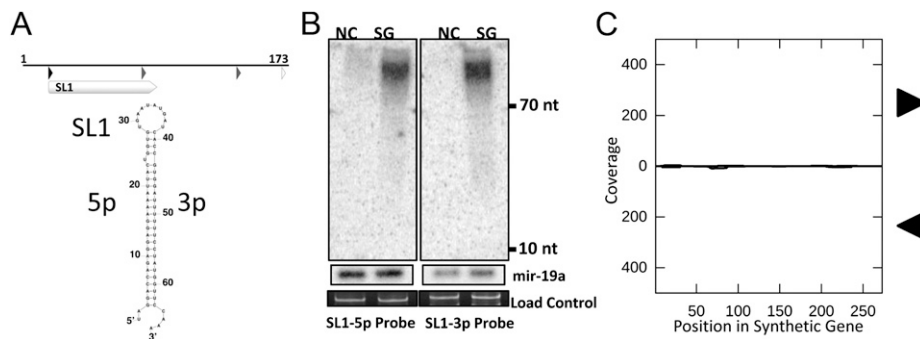

**Fig. S2.** A combined computational and synthetic approach fails to identify a macaque simian foamy virus-encoded miRNA. (A) Schematic of the organization of the predicted macaque simian foamy virus miRNA gene region. The predicted A Box-like, B Box-like, and terminator-like sequences are represented by black, gray, and white triangles, respectively, and Mfold RNA secondary structure predictions for the predicted miRNA stem-loop sequence is presented below. The genomic coordinates refer to reference sequence NC\_010819. (B) Northern blot analysis of 293T cells transfected with the synthetic miRNA gene construct (SG lanes) or empty vector (NC lanes). Blots were stripped and reprobed for host mir-19a. The load control is ethidium bromide-stained low molecular weight RNA. (C) Small RNA profiling of 293T cells transfected with the synthetic miRNA construct reveals few reads mapping to the synthetic gene sequence.

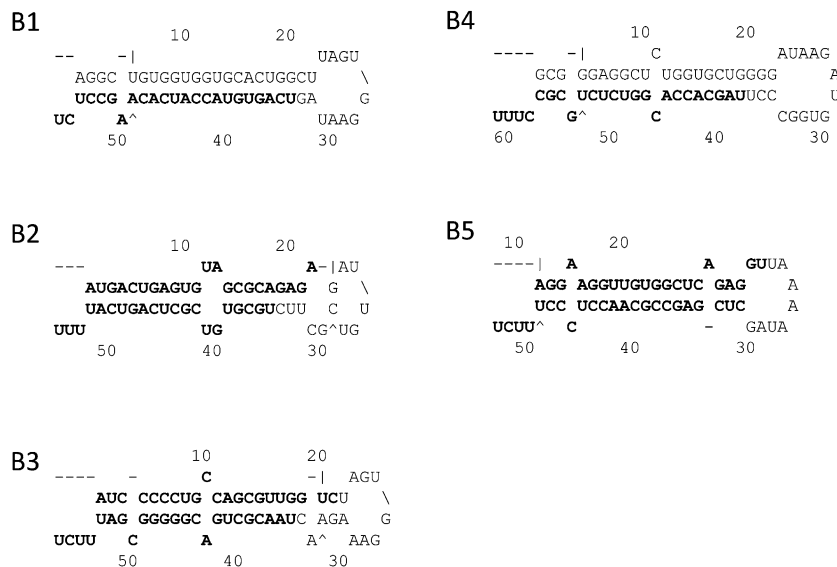

**Fig. S3.** Predicted RNA secondary structures of BLV-encoded pre-miRNAs. Predictions were generated using the Mfold software (9). The most commonly sequenced mature miRNA products from the BL3.1 cell line are in bold.



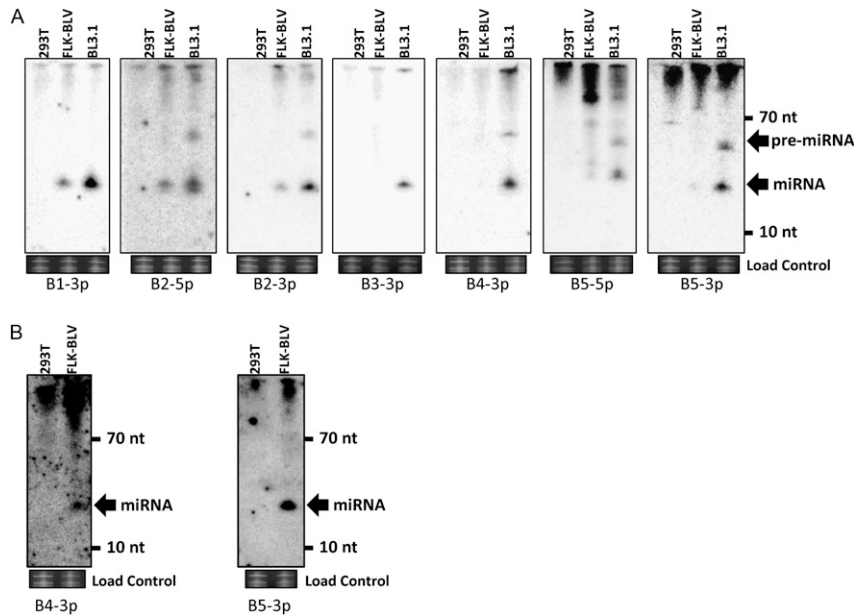

**Fig. 54.** Virus-derived small RNAs are detectable in both BL3.1 and FLK-BLV cell lines. (A) Northern blot analysis of RNA harvested from HEK293T, FLK-BLV, and BL3.1 cell lines. The load control is ethidium bromide-stained low molecular weight RNA. (B) Northern blot analysis of control 293T and FLK-BLV RNA probed with oligonucleotides designed to be perfectly complementary to the BLV913 miRNA sequences. The load control is ethidium bromide-stained low molecular weight RNA.

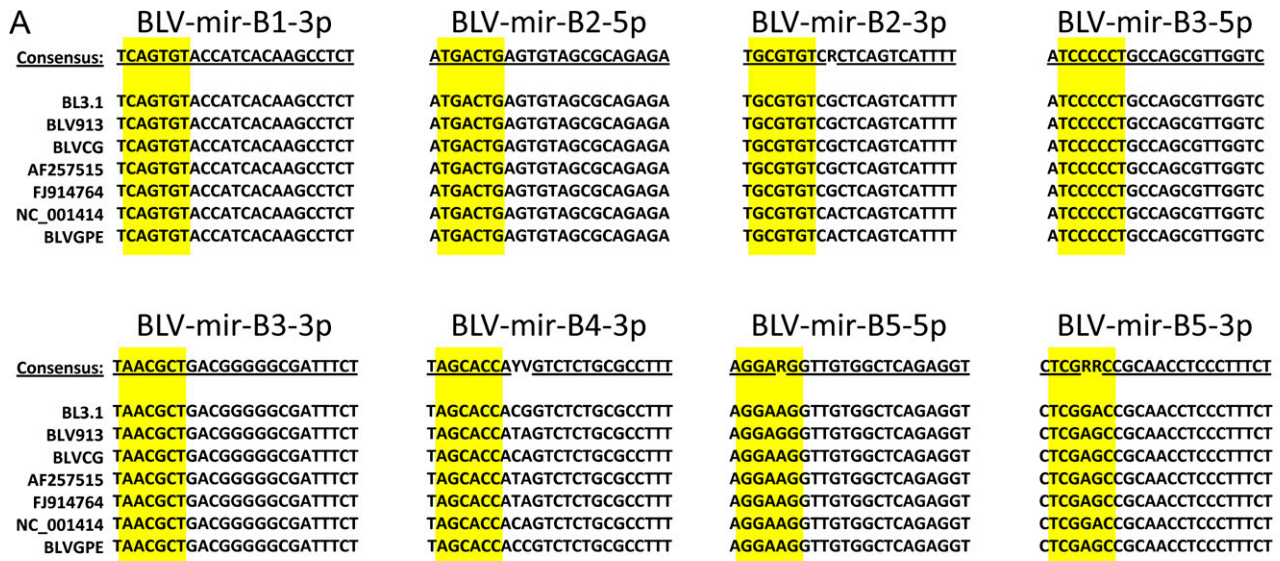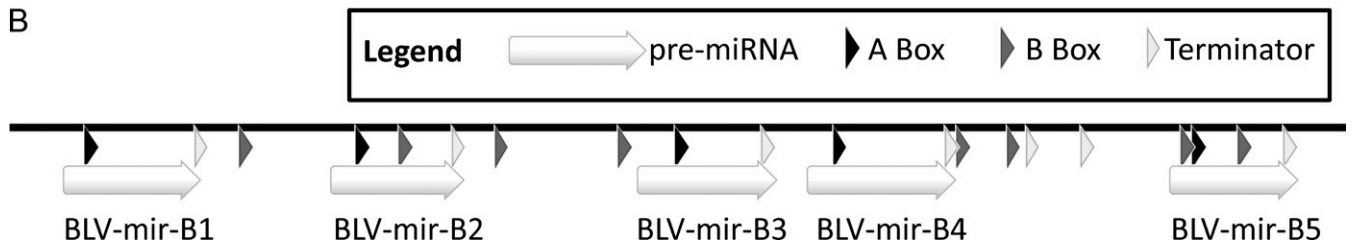

**Fig. 55.** BLV encoded miRNAs and predicted promoter elements are conserved across isolates. (A) Alignments of the most commonly sequenced mature miRNAs. Highlighted regions indicate the miRNA seed regions. Underlined sequences in consensus indicate 100% identity across isolates. (B) Schematic of conserved promoter-like elements across alignment of BLV isolates generated by individual promoter element searches.

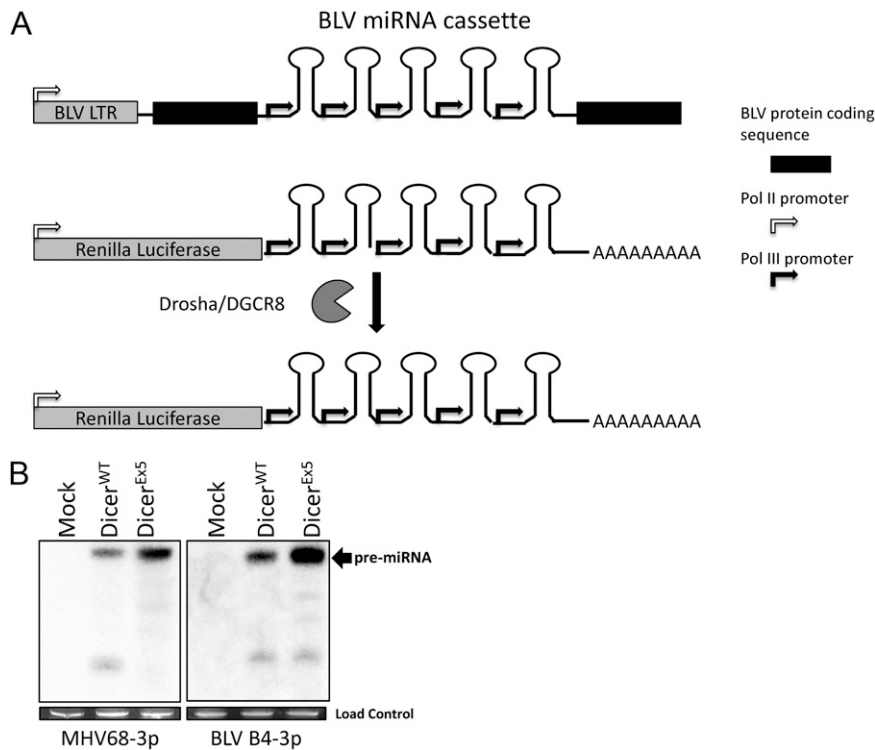

**Fig. S6.** Characterization of BLV-mir-B4 biogenesis. (A) Schematic of BLV miRNAs in the context of the viral genome. The miRNA cluster is transcribed by pol II in the production of full-length genomic RNA. Below is a schematic of the BLV miRNAs in the context of the *Renilla* luciferase reporter. The miRNA cluster is transcribed by pol II from the vector CMV promoter. The viral miRNA cluster is resistant to Drosha cleavage when transcribed in the context of the long pol II transcripts. (B) Northern blot analysis of MHV68-M1-7 and BLV-B4 miRNA expression vectors transfected into DLD1 cells with wild-type Dicer (Dicer<sup>WT</sup>) or hypomorphic for Dicer activity (Dicer<sup>Ex5</sup>) (14). The load control is ethidium bromide-stained low molecular weight RNA. As expected, reduced Dicer activity results in an accumulation of the Dicer substrate pre-miRNA for the positive control MHV68 miRNA. Accumulation of the pre-miRNA was also observed for the BLV miRNA, most consistent with its biogenesis being Dicer-dependent.

**Table S1. Summary of retroviruses with predicted pol III miRNA genes**

| Family              | Subfamily                | Genus           | Species                    | Detected by Northern blot | Detected by sequencing |
|---------------------|--------------------------|-----------------|----------------------------|---------------------------|------------------------|
| <i>Retroviridae</i> | <i>Orthoretrovirinae</i> | Deltaretrovirus | Bovine leukemia virus      | +                         | +                      |
| <i>Retroviridae</i> | <i>Spumaretrovirinae</i> | Spumavirus      | Bovine foamy virus         | N/A                       | N/A                    |
| <i>Retroviridae</i> | <i>Spumaretrovirinae</i> | Spumavirus      | Equine foamy virus         | N/A                       | N/A                    |
| <i>Retroviridae</i> | <i>Spumaretrovirinae</i> | Spumavirus      | Feline foamy virus         | N/A                       | N/A                    |
| <i>Retroviridae</i> | <i>Spumaretrovirinae</i> | Spumavirus      | Macaque simian foamy virus | —                         | —                      |
| <i>Retroviridae</i> | <i>Spumaretrovirinae</i> | Spumavirus      | Simian foamy virus         | N/A                       | N/A                    |

N/A refers to candidates not screened. + indicates detected in screen. — indicates inability to detect in screen.

**Table S2. Most-often sequenced small RNA sequences from BL3.1 cells that map to the BLV miRNA loci**

| No. mapped | Start | Sequence                    | End  | Length |
|------------|-------|-----------------------------|------|--------|
| 26,334     | 6220  | TCAGTGTACCATCACAAAGCCTCT    | 6242 | 23     |
| 9,379      | 6298  | ATGACTGAGTGTAGCGCAGAGA      | 6319 | 22     |
| 5,881      | 6460  | TAACGCTGACGGGGGCGATTTCT     | 6482 | 23     |
| 5,679      | 6220  | TCAGTGTACCATCACAAAGCCTC     | 6241 | 22     |
| 3,751      | 6298  | ATGACTGAGTGTAGCGCAGA        | 6317 | 20     |
| 3,680      | 6649  | AAGGAAGGTTGTGGCTCAGAGGT     | 6670 | 23     |
| 3,556      | 6297  | ACATGACTGAGTGTAGCGCAGA      | 6317 | 22     |
| 3,451      | 6220  | TCAGTGTACCATCACAAAGCCTCT    | 6243 | 24     |
| 3,271      | 6333  | TGCGTGCACTCAGTCATTTT        | 6352 | 21     |
| 2,870      | 6220  | TCAGTGTACCATCACAAAGCCTCT    | 6241 | 23     |
| 2,680      | 6220  | TCAGTGTACCATCACAAAGCCT      | 6240 | 21     |
| 2,025      | 6679  | CTCGGACCGCAACCTCCCTTTCT     | 6701 | 23     |
| 1,973      | 6298  | ATGACTGAGTGTAGCGCAGAGAG     | 6319 | 23     |
| 1,948      | 6460  | TAACGCTGACGGGGGCGATTTC      | 6481 | 22     |
| 1,824      | 6534  | TAGCACCACGGTCTCTGCGCCTTT    | 6557 | 24     |
| 1,674      | 6298  | ATGACTGAGTGTAGCGCAGA        | 6316 | 20     |
| 1,234      | 6220  | TCAGTGTACCATCACAAAGCCTCTTC  | 6243 | 25     |
| 1,200      | 6298  | ATGACTGAGTGTAGCGCAGAGA      | 6318 | 22     |
| 1,128      | 6298  | ATGACTGAGTGTAGCGCAGAG       | 6317 | 21     |
| 1,122      | 6649  | AAGGAAGGTTGTGGCTCAGAGGTT    | 6671 | 24     |
| 1,081      | 6298  | ATGACTGAGTGTAGCGCAGAG       | 6318 | 21     |
| 1,039      | 6220  | TCAGTGTACCATCACAAAGCCTCTT   | 6242 | 24     |
| 998        | 6298  | ATGACTGAGTGTAGCGCAGAGA      | 6317 | 22     |
| 939        | 6333  | TGCGTGCACTCAGTCATTT         | 6351 | 20     |
| 905        | 6297  | ACATGACTGAGTGTAGCGCAGA      | 6316 | 22     |
| 860        | 6220  | TCAGTGTACCATCACAAAGCCTCT    | 6240 | 23     |
| 845        | 6649  | AAGGAAGGTTGTGGCTCAGAGG      | 6669 | 22     |
| 802        | 6220  | TCAGTGTACCATCACAAAGCCTCTTC  | 6242 | 25     |
| 762        | 6220  | TCAGTGTACCATCACAAAGCCTC     | 6240 | 22     |
| 724        | 6534  | TAGCACCACGGTCTCTGCGCCTTTT   | 6558 | 25     |
| 716        | 6460  | TAACGCTGACGGGGGCGATTTCT     | 6481 | 23     |
| 709        | 6649  | AAGGAAGGTTGTGGCTCAGAGG      | 6668 | 22     |
| 686        | 6460  | TAACGCTGACGGGGGCGATTTC      | 6480 | 21     |
| 620        | 6220  | TCAGTGTACCATCACAAAGCCTCTT   | 6241 | 24     |
| 617        | 6649  | AAGGAAGGTTGTGGCTCAGAGGTTA   | 6672 | 25     |
| 573        | 6330  | TCTGCGTGCACTCAGTCATTT       | 6351 | 22     |
| 564        | 6460  | TAACGCTGACGGGGGCGATTTCTT    | 6482 | 24     |
| 532        | 6297  | ACATGACTGAGTGTAGCGCAGAG     | 6317 | 23     |
| 529        | 6649  | AAGGAAGGTTGTGGCTCAGAG       | 6668 | 21     |
| 465        | 6534  | TAGCACCACGGTCTCTGCGCCTT     | 6556 | 23     |
| 435        | 6220  | TCAGTGTACCATCACAAAGCCTCTTCT | 6243 | 26     |
| 414        | 6649  | AAGGAAGGTTGTGGCTCAGAGGT     | 6669 | 23     |
| 413        | 6333  | TGCGTGCACTCAGTCATTTT        | 6353 | 22     |
| 393        | 6649  | AAGGAAGGTTGTGGCTCAGAGGTTA   | 6671 | 25     |
| 361        | 6680  | TCGGACCGCAACCTCCCTTTCT      | 6701 | 22     |
| 351        | 6298  | ATGACTGAGTGTAGCGCAGAGAGG    | 6321 | 24     |
| 341        | 6649  | AAGGAAGGTTGTGGCTCAGAGGTT    | 6670 | 24     |
| 335        | 6220  | TCAGTGTACCATCACAAAGCCTCTTCT | 6242 | 26     |
| 312        | 6298  | ATGACTGAGTGTAGCGCAGAGAGG    | 6319 | 24     |
| 309        | 6679  | CTCGGACCGCAACCTCCCTTTCT     | 6700 | 22     |

**Table S3. Most-often sequenced small RNA sequences from BL3.1 cells that map to bovine host miRNAs listed in miRBase (1)**

| No. mapped | Sequence                  | Length |
|------------|---------------------------|--------|
| 36,224     | UGUGCAAUCCAUGCAAACUGA     | 23     |
| 21,239     | AACCCGUAGAUCCGAUCUUGUG    | 23     |
| 20,644     | UCCCUAGACCCUAACUUGUGA     | 22     |
| 14,433     | UAUUGCACUUGUCCCGGCCUGU    | 22     |
| 13,565     | UGUGCAAUCCAUGCAAACUG      | 22     |
| 12,391     | AACCCGUAGAUCCGAUCUUGUG    | 22     |
| 11,554     | AACAUUCAACGCUGUCGGUGAGU   | 23     |
| 6,909      | UGUGCAAUCUAUGCAAACUGA     | 23     |
| 6,588      | UAGCACCAUCUGAAAUCGGUUA    | 22     |
| 6,376      | CAACGGAAUCCAAAAGCAGCU     | 22     |
| 5,738      | UAGCUUAUCAGACUGAUGUUGAC   | 23     |
| 4,712      | UGAGGUAGUAGGUUGUAUGGUU    | 22     |
| 4,442      | AACCCGUAGAUCCGAUCUUGU     | 21     |
| 3,978      | UAGCACCAUUUGAAAUCAGUGUU   | 23     |
| 3,928      | CAUUGCACUUGUCUCGGUCUGA    | 22     |
| 3,736      | AGCAGCAUUGUACAGGGCUAUGA   | 23     |
| 3,467      | UAGCAGCACAUCAUGUUUACA     | 22     |
| 3,428      | CAAAGUGCUIACAGUGCAGGUAG   | 23     |
| 3,231      | UGAGGUAGUAGGUUGUAUAGUU    | 22     |
| 3,196      | UGUGCAAUCCAUGCAAACUG      | 22     |
| 2,774      | UGUGCAAUCCAUGCAAACUGA     | 23     |
| 2,669      | UGGCUCAGUUCAGCAGGAACAGG   | 23     |
| 2,551      | UGUGCAAUCUAUGCAAACUG      | 22     |
| 2,548      | UAGCACCAUUUGAAAUCGGUUA    | 22     |
| 2,347      | UCCCUGUCCUCCAGGAGCUCA     | 21     |
| 2,112      | AUCACAUUGCCAGGGAUUCCA     | 22     |
| 2,075      | CAACGGAAUCCAAAAGCAGCUG    | 23     |
| 2,016      | UAAAGUGCUIUAGUGCAGGUAG    | 23     |
| 1,914      | UUAAGUAAUCCAGGAUAGGCU     | 22     |
| 1,899      | UGAGGUAGUAGAUUGUAUAGUU    | 22     |
| 1,783      | CAAAGUGCUIACAGUGCAGGUAGU  | 24     |
| 1,726      | UCCCUAGACCCUAACUUGUG      | 21     |
| 1,697      | UCCCUAGACCCUAACUUGUGAU    | 23     |
| 1,632      | UAGCAGCACGUAUUUUGGCGU     | 23     |
| 1,604      | UAGCAGCACGUAUUUUGGCG      | 22     |
| 1,568      | UGUAGUGUUCCUACUUUAUGGA    | 23     |
| 1,510      | UGUGCAAUCCAUGCAAACU       | 21     |
| 1,506      | UCCCUGUCCUCCAGGAGCUCACU   | 23     |
| 1,506      | UGUAGUGUUCCUACUUUAUGG     | 22     |
| 1,452      | UGAGGUAGUAGUUUGUACAGUU    | 22     |
| 1,446      | UAUUGCACUUGUCCCGGCCUGUU   | 23     |
| 1,278      | UAUUGCACUUGUCCCGGCCUGUUG  | 24     |
| 1,243      | AACAUUCAACGCUGUCGGUGAGUUU | 25     |
| 1,173      | UAGCUUAUCAGACUGAUGUUGACU  | 24     |
| 1,139      | AAUGACACGAUCACUCCGUUGA    | 23     |
| 1,109      | CAAAGUGCUGUUCGUGCAGGUAG   | 23     |
| 1,107      | UGUAGUGUUCCUACUUUAUGGA    | 23     |
| 1,106      | UAAAGUGCUIUAGUGCAGGUAG    | 23     |
| 1,103      | CAGUGCAAUGAUGAAAGGCAU     | 22     |
| 1,059      | UGAGGUAGUAGGUUGUAUGGUUU   | 23     |

1. Griffiths-Jones S (2006) miRBase: The microRNA sequence database. *Methods Mol Biol* 342:129–138.





**Table S4. Cont.**

| Oligonucleotide name | Sequence                                                                                                                                                                                                                                                                                                                                                                                                                                                                                                                                    |
|----------------------|---------------------------------------------------------------------------------------------------------------------------------------------------------------------------------------------------------------------------------------------------------------------------------------------------------------------------------------------------------------------------------------------------------------------------------------------------------------------------------------------------------------------------------------------|
| BTA_PXDN SM_3UTR     | TCTAGAGTTTGCCAGGGACGGATTCTCTTTCAAATCCTGCGT<br>CCCTCCTCCGCTGCTCCGCTCTGCACGCTTCTGGAGCCGGGA<br>CCGGCGGGACTAAGTTTCAGTTGAGAAGAAACGGTGATACT<br>AGGTGAAATCAATTAGGAGCCTAAATGATTGAACTGTGCAA<br>TTTAATAGTAGGGCCAATTTTTCATTAATAAAAAATTAATA<br>TAGAACCTGAGAAGCCTAACATGGAGTCAGGCACG<br>CGTCTGCCCCGTGGTCTGCTGGCGAGCGCTCAGGCCGG<br>GGTTCCCGAGCCGCGGCCCGCGTCCAGCCTCGCC<br>GCCTACGCGGCTCGTCCCAAGGGCTGGGACAAGCT<br>CCGGGCTCGCAGACGCCTCGAG                                                                                                                     |
| BTA_HPBI_SM Fragment | GATATCCTGTGGCCCTAAAGTACAGTAGAAAAGAGAGGAG<br>AAGTGTATACATGTTTTATTTAAATTGTACAAA<br>GGGGAATTTAAAAATATGTAAGTCTGTTTATACATT<br>GGCTCCTACTGCTTATTAATCTGTATTGTACACATAA<br>TGGGGTGAAGCAGAAGCCGGGAGTTGGCCTTCCTT<br>GAGCAACCACCACATGGCTCAGCATCTGTGCCAAA<br>CACAGGGGCTCCTAGTCTGGCCAGTGCCAAGAGGTT<br>GCCAGGACACAGGGCCGGTGGATGGTGCCAGTGCCAG<br>CCTAGCCACTGGCCGCGCTCCTGAGCATGCTGAGTT<br>GGACACACCGGGCGGCGGCCACCTTGACTTCAGT<br>GGAGACCCAGCCAGGCCAAGGTAAGTTAGTTAATA<br>GCATTGGGATATTGCTACTGTAATGGTGCTGTTAACAGTTG<br>ACACCATTGTATTTTAACTTTGTGCCTATATCTCCTCAGC |
